# Supplementary material for: Pro-oncogenic cytokines and growth factors are differentially expressed in the post-surgical wound fluid from malignant compared to benign breast lesions
Source: PubMed Central journal article supplement (PMC4560730; doi:10.1186/s40064-015-1260-8), 2015-09-05
Supplement: 40064_2015_1260_MOESM1_ESM.pdf [file 40064_2015_1260_MOESM1_ESM.pdf]

Valeta-Magara et al., Suppl. Figure 1

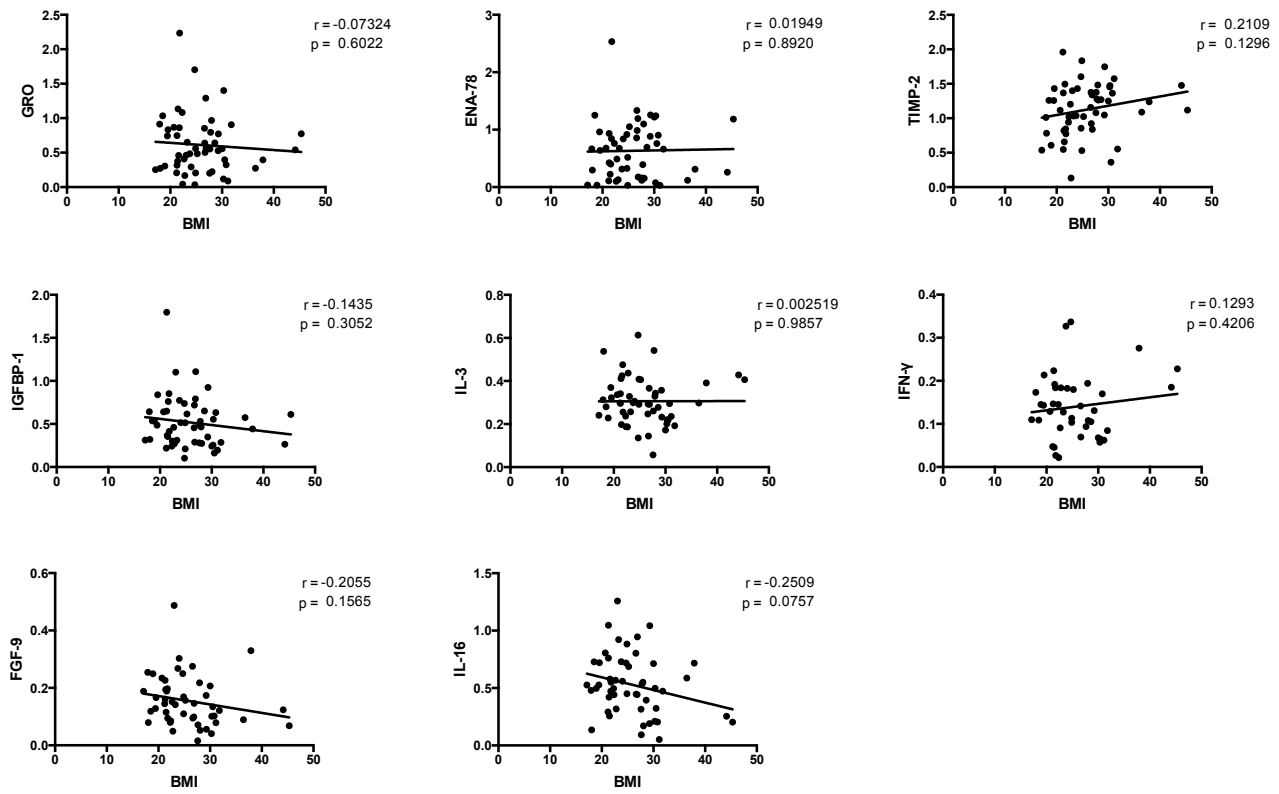

Valeta-Magara et al., Suppl. Figure 2

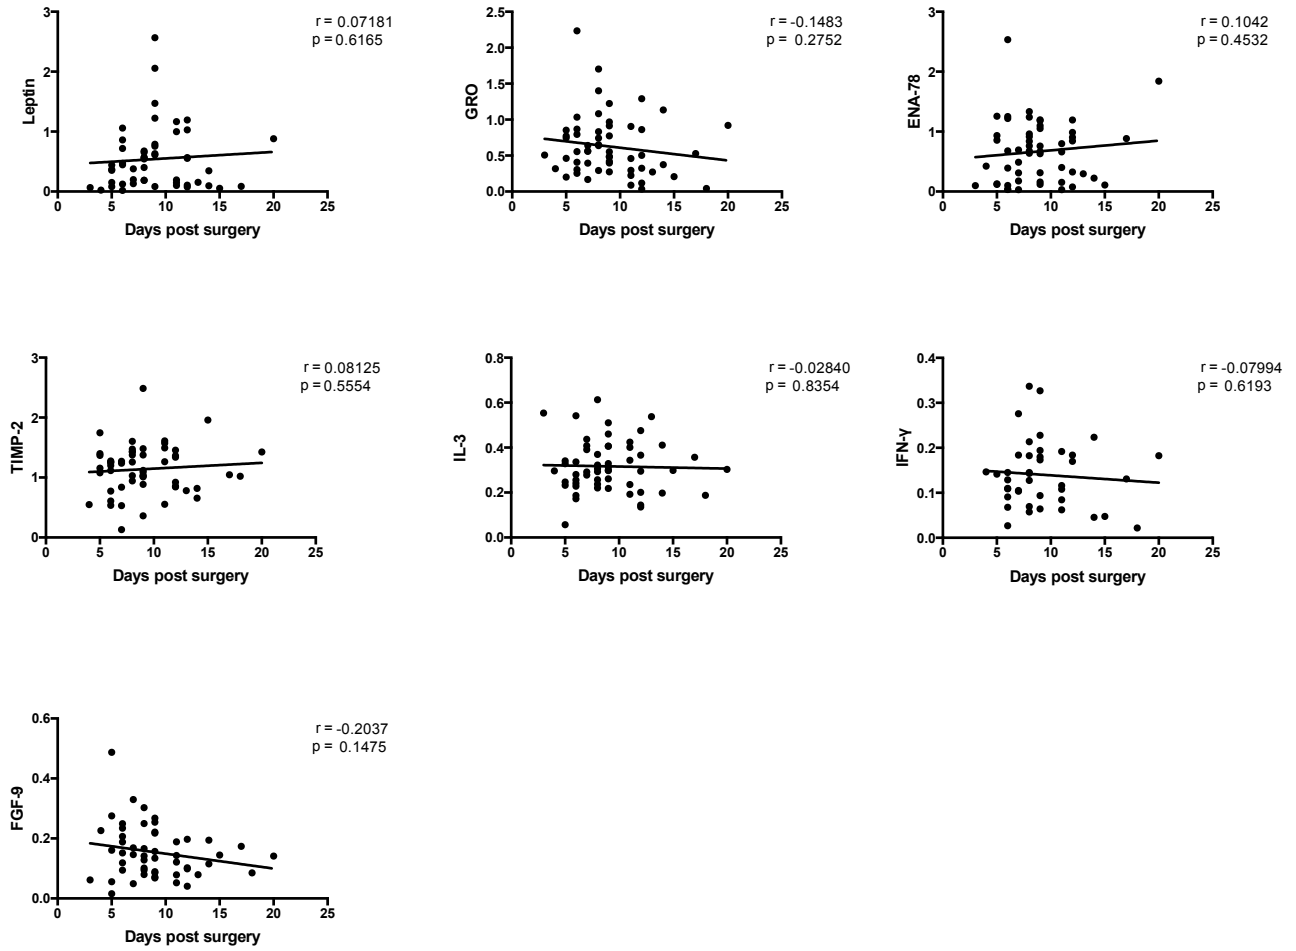

Valeta-Magara et al., Suppl. Figure 3

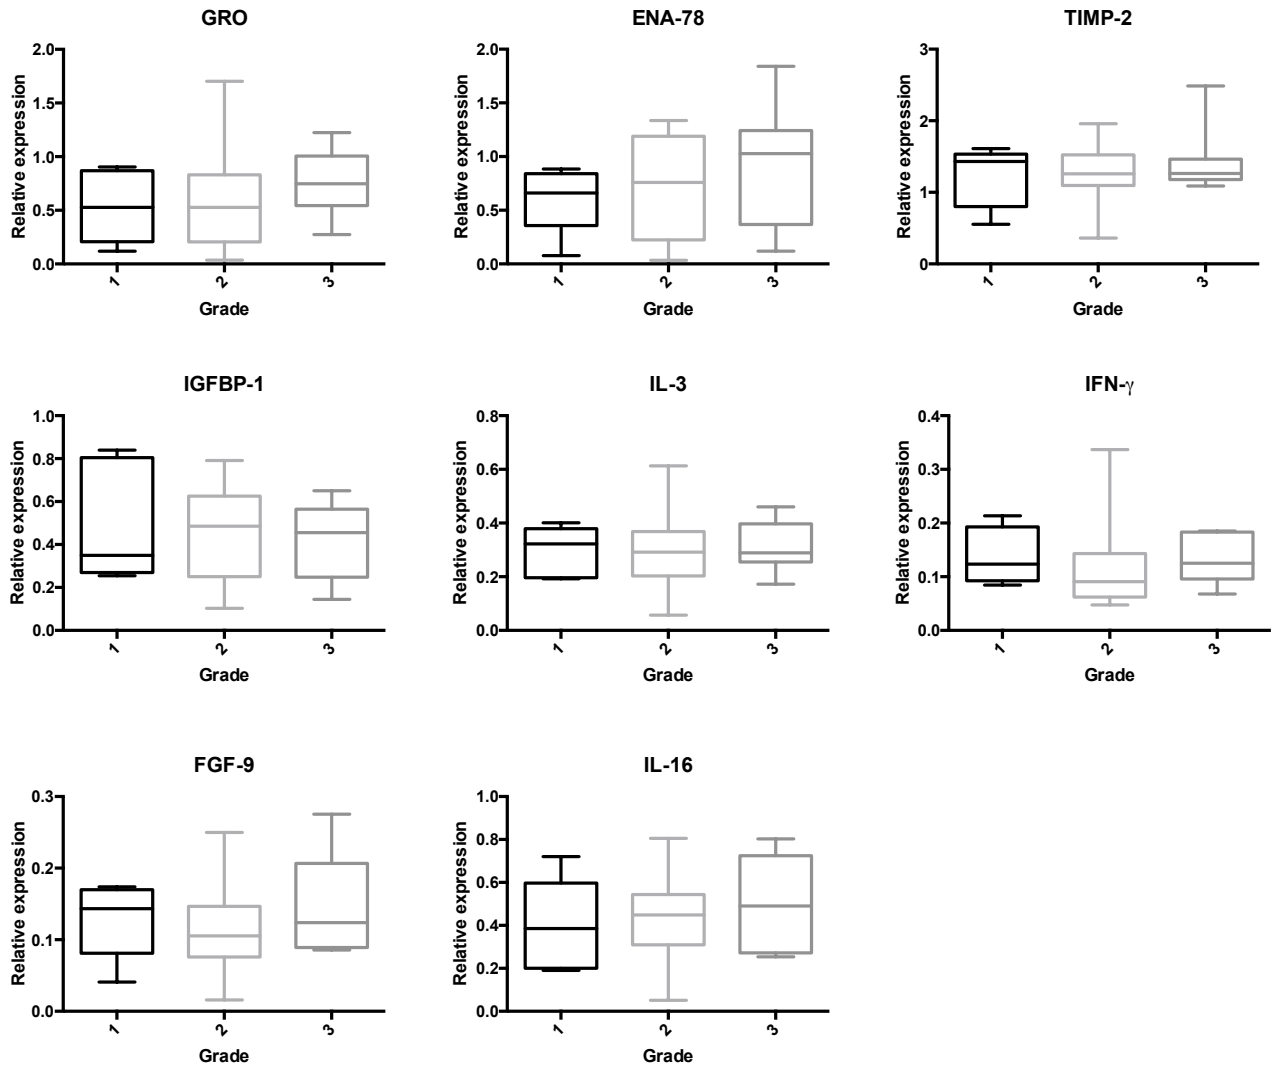

p-value summary from one-way Anova, Tukey's multiple comparisons test

| Cytokine      | 1 vs. 2 | 1 vs. 3 | 2 vs. 3 |
|---------------|---------|---------|---------|
| Leptin        | 0.5994  | 0.2113  | 0.4925  |
| GRO           | 0.8889  | 0.6338  | 0.7822  |
| ENA-78        | 0.9079  | 0.4800  | 0.5467  |
| TIMP-2        | 0.9686  | 0.6447  | 0.6378  |
| IGFBP-1       | 0.8984  | 0.7763  | 0.9231  |
| IL-3          | 0.9994  | 0.9792  | 0.9520  |
| IFN- $\gamma$ | 0.9419  | 0.9955  | 0.9623  |
| FGF-9         | 0.9415  | 0.8617  | 0.5646  |
| IL-16         | 0.9112  | 0.6505  | 0.7866  |

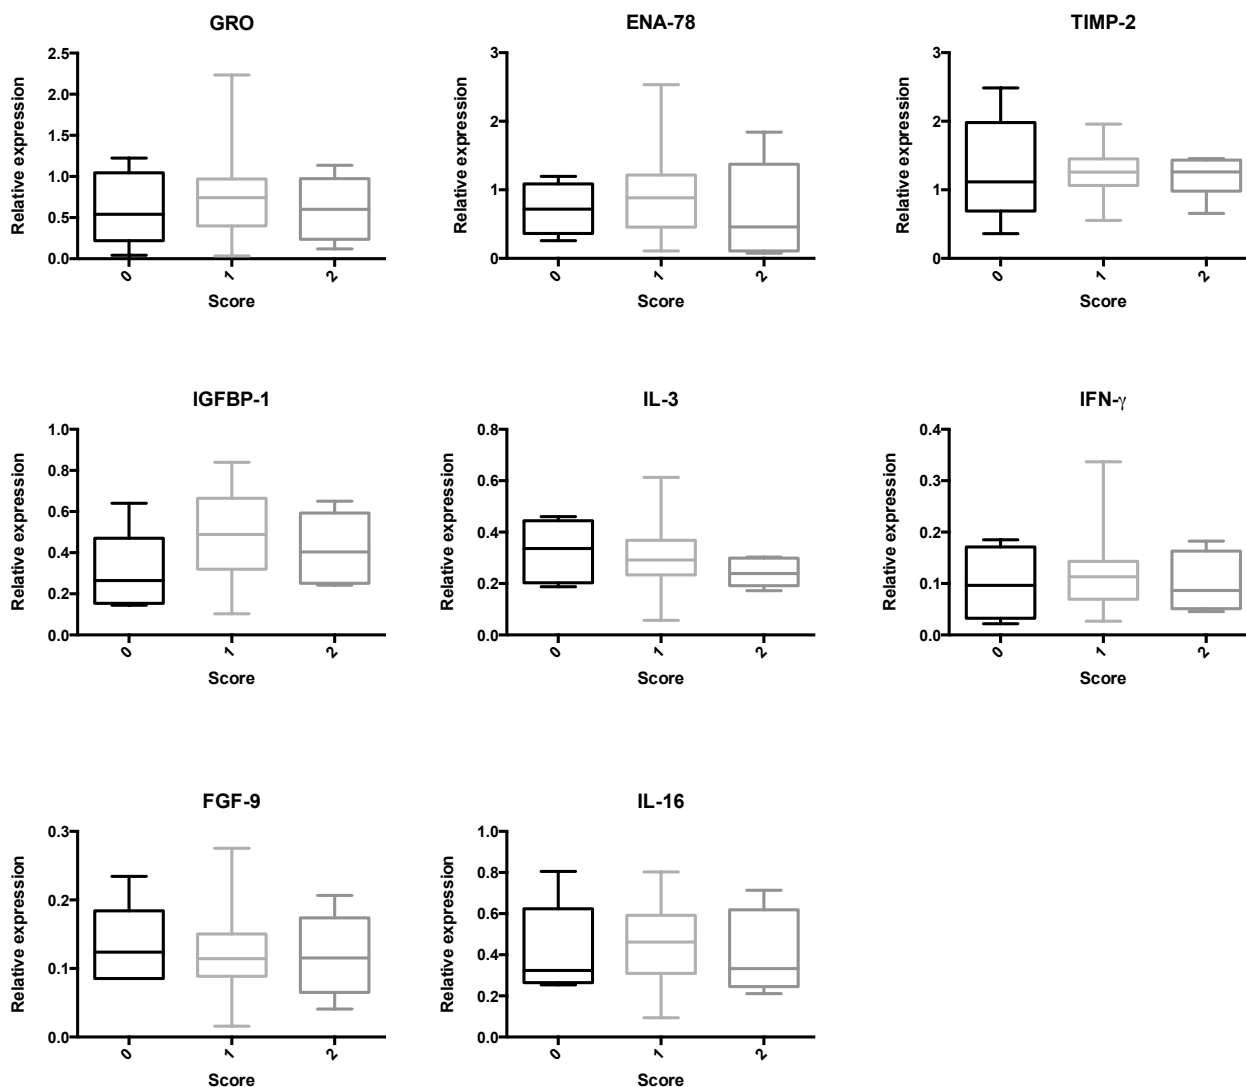

p-value summary from one-way Anova, Tukey's multiple comparisons test

| Cytokine      | 0 vs. 1 | 0 vs. 2  | 1 vs. 2 |
|---------------|---------|----------|---------|
| Leptin        | 0.4389  | 0.5449   | 0.9998  |
| GRO           | 0.7977  | 0.9997   | 0.7539  |
| ENA-78        | 0.8797  | 0.9969   | 0.7799  |
| TIMP-2        | 0.9899  | 0.9187   | 0.9283  |
| IGFBP-1       | 0.1448  | 0.5826   | 0.7179  |
| IL-3          | 0.9005  | 0.4724   | 0.5349  |
| IFN- $\gamma$ | 0.8012  | > 0.9999 | 0.8049  |
| FGF-9         | 0.9545  | 0.9360   | 0.9888  |
| IL-16         | 0.9000  | 0.9928   | 0.8121  |
